# Supplementary material for: Spectrophotometric and computational insights into the 2-ethylimidazole–3,5-dinitrobenzoic acid complex: BSA interaction and antimicrobial activity
Source: Royal Society of Chemistry journal article supplement (doi:10.1039/d5nj00346f), 2025-01-01
Supplement: d5nj00346f1.pdf [file d5nj00346f1.pdf]

## Spectrophotometric and Computational Insights into 2-Ethylimidazole–3,5-Dinitrobenzoic Acid Complex: BSA Interaction and Antimicrobial Activity

Farha Naaz<sup>a</sup>, Ishaat M. Khan<sup>a\*</sup>, Sonam Shakya<sup>a</sup>, Maidul Islam<sup>a,b</sup>, Nisat Alam<sup>c</sup>, Abdullah Alarifi<sup>d</sup>, Xiang Li<sup>e</sup>

<sup>a</sup> Department of Chemistry, Faculty of Science, Aligarh Muslim University, Aligarh (U.P.) – India 202002

<sup>b</sup> Research and Development Cell, Lovely Professional University, Phagwara, Punjab-144411, India

<sup>d</sup> Department of Chemistry, College of Science, King Saud University, Riyadh 11451, Saudi Arabia.

<sup>e</sup> Jiangsu Key Laboratory of Pesticide Science and Department of Chemistry, College of Science, Nanjing Agricultural University, Nanjing, 210095, China.

**Table: S1.** Gaussian analysis of synthesized CT complex in 4 polar solvents.

| Solvent         | Area of the curve<br>(A) | Width of the curve<br>(w) | Centre of the curve<br>(x <sub>c</sub> ) | y <sub>o</sub>   |
|-----------------|--------------------------|---------------------------|------------------------------------------|------------------|
| <b>Methanol</b> | 63.4161 ± 14.725         | 38.8196 ± 0.18243         | 239.6856 ± 0.82224                       | 1.7219 ± 0.18204 |
| <b>Ethanol</b>  | 17.1471 ± 7.49478        | 37.7472 ± 8.23096         | 218.9692 ± 0.8546                        | 1.2506 ± 0.10353 |
| <b>DMSO</b>     | 17.3921 ± 3.53897        | 24.4567 ± 2.19525         | 264.6052 ± 0.09732                       | 0.6557 ± 0.07952 |
| <b>ACN</b>      | 31.8063 ± 1.38499        | 22.7899 ± 0.59747         | 203.4427 ± 0.13474                       | 2.2730 ± 0.0253  |

**Table: S2.** Fractional Atomic Coordinates ( $\times 10^4$ ) and Equivalent Isotropic Displacement Parameters ( $\text{\AA}^2 \times 10^3$ ) for CT Complex.  $U_{eq}$  is defined as 1/3 of the trace of the orthogonalized  $U_{ij}$  tensor.

| Atom       | x            | Y           | z           | U(eq)   |
|------------|--------------|-------------|-------------|---------|
| <b>O5</b>  | -1886.2(19)  | -3047.9(15) | -3357.7(11) | 57.0(4) |
| <b>O4</b>  | -4098(2)     | -2628.0(19) | -7927.3(13) | 66.9(4) |
| <b>O6</b>  | -3322.3(18)  | -4772.8(17) | -2359.7(12) | 59.6(4) |
| <b>N4</b>  | 679(2)       | -6947.7(19) | 1004.6(16)  | 47.3(4) |
| <b>N2</b>  | -5494(3)     | -3252.9(19) | -7825.5(14) | 52.6(4) |
| <b>O2</b>  | -10639.3(19) | -5185(2)    | -5955.3(14) | 77.3(5) |
| <b>O3</b>  | -6666(2)     | -3561.6(19) | -8713.0(12) | 79.1(5) |
| <b>N1</b>  | -9382(2)     | -5350(2)    | -5098.4(17) | 57.0(5) |
| <b>N3</b>  | -669(2)      | -5897.1(19) | -677.4(13)  | 48.2(4) |
| <b>O1</b>  | -9464(2)     | -6026(2)    | -4122.7(15) | 80.6(5) |
| <b>C7</b>  | -3143(3)     | -3956(2)    | -3280.5(16) | 43.0(4) |
| <b>C3</b>  | -5790(3)     | -3685(2)    | -6566.8(15) | 40.5(4) |
| <b>C6</b>  | -6266(2)     | -4666(2)    | -4254.4(16) | 40.0(4) |
| <b>C10</b> | -834(3)      | -6267(2)    | 479.4(16)   | 41.7(4) |

|            |          |          |             |         |
|------------|----------|----------|-------------|---------|
| <b>C5</b>  | -4637(2) | -4062(2) | -4405.5(15) | 37.5(4) |
| <b>C1</b>  | -7646(2) | -4712(2) | -5270.1(16) | 41.5(4) |
| <b>C4</b>  | -4386(2) | -3566(2) | -5575.1(15) | 40.0(4) |
| <b>C2</b>  | -7443(3) | -4219(2) | -6441.3(17) | 45.6(5) |
| <b>C8</b>  | 1802(3)  | -7017(2) | 154.1(19)   | 55.3(6) |
| <b>C11</b> | -2411(3) | -5944(3) | 1059.9(19)  | 56.6(6) |
| <b>C9</b>  | 963(3)   | -6362(2) | -895.4(19)  | 54.6(5) |
| <b>C12</b> | -2930(3) | -7305(3) | 1816(2)     | 67.8(6) |

**Table: S3.** Anisotropic Displacement Parameters ( $\text{\AA}^2 \times 10^3$ ) for CT Complex. The Anisotropic displacement factor exponent takes the form:  $-2\pi^2[h^2a^{*2}U_{11}+2hka^*b^*U_{12}+\dots]$ .

| <b>Atom</b> | <b>U<sub>11</sub></b> | <b>U<sub>22</sub></b> | <b>U<sub>33</sub></b> | <b>U<sub>12</sub></b> | <b>U<sub>13</sub></b> | <b>U<sub>23</sub></b> |
|-------------|-----------------------|-----------------------|-----------------------|-----------------------|-----------------------|-----------------------|
| <b>O5</b>   | 58.2(9)               | 65.7(10)              | 40.2(7)               | -18.2(8)              | -10.3(6)              | 0.4(7)                |
| <b>O4</b>   | 75.4(11)              | 80.5(11)              | 48.5(8)               | 0.0(9)                | 21.4(8)               | 3.0(8)                |
| <b>O6</b>   | 56.1(9)               | 75.9(10)              | 39.7(7)               | -6.2(7)               | -11.2(6)              | 19.7(7)               |
| <b>N4</b>   | 51.2(11)              | 50.0(10)              | 35.7(8)               | 6.7(8)                | -5.8(8)               | 3.4(8)                |
| <b>N2</b>   | 69.1(12)              | 51.7(11)              | 34.6(9)               | 9.7(10)               | 3.0(9)                | 0.8(8)                |
| <b>O2</b>   | 39.9(9)               | 108.6(14)             | 75.4(11)              | 1.7(9)                | -11.5(8)              | -9.5(10)              |
| <b>O3</b>   | 102.4(13)             | 92.8(13)              | 32.5(7)               | -7.6(10)              | -14.5(8)              | 3.2(8)                |
| <b>N1</b>   | 43.7(11)              | 68.9(12)              | 55.5(11)              | 1.1(9)                | 1.2(9)                | -11.3(10)             |
| <b>N3</b>   | 51.5(11)              | 53.3(10)              | 36.0(8)               | 4.3(8)                | -2.9(7)               | 9.8(7)                |
| <b>O1</b>   | 60.4(10)              | 113.1(14)             | 69.3(10)              | 16.7(10)              | 14.2(8)               | 11.5(11)              |
| <b>C7</b>   | 44.6(11)              | 46.8(11)              | 32.9(10)              | 2.5(10)               | 5.6(8)                | 1.8(9)                |
| <b>C3</b>   | 49.8(12)              | 40.4(11)              | 29.1(9)               | 6.5(9)                | 0.9(8)                | 0.2(8)                |
| <b>C6</b>   | 46.0(11)              | 40.9(10)              | 31.0(9)               | 5.3(9)                | 1.3(8)                | -1.0(8)               |
| <b>C10</b>  | 47.2(11)              | 40.7(10)              | 33.8(9)               | 1.1(9)                | -1.9(8)               | 2.6(9)                |
| <b>C5</b>   | 41.1(10)              | 35.5(10)              | 32.3(9)               | 2.2(8)                | -3.8(7)               | -0.2(8)               |
| <b>C1</b>   | 34.9(10)              | 44.6(11)              | 42.7(10)              | 2.4(9)                | 0.4(8)                | -4.2(9)               |
| <b>C4</b>   | 42.4(11)              | 39.6(10)              | 35.8(9)               | 2.1(8)                | 1.3(8)                | -3.3(8)               |
| <b>C2</b>   | 47.0(12)              | 48.6(12)              | 35.6(10)              | 7.3(9)                | -8.5(8)               | -5.1(9)               |
| <b>C8</b>   | 47.8(13)              | 62.3(14)              | 54.8(12)              | 7.7(11)               | 6.7(10)               | -0.4(11)              |
| <b>C11</b>  | 58.2(13)              | 62.3(14)              | 48.9(11)              | 11.9(11)              | 8.7(10)               | 3.1(11)               |
| <b>C9</b>   | 55.2(14)              | 61.2(13)              | 48.3(12)              | 4.4(11)               | 12.0(10)              | 6.4(11)               |
| <b>C12</b>  | 65.8(15)              | 81.0(17)              | 58.0(13)              | -3.7(14)              | 14.4(11)              | 11.3(13)              |

**Table: S4.** Bond Lengths for CT Complex.

| <b>Atom</b> | <b>Atom</b> | <b>Length/\AA</b> | <b>Atom</b> | <b>Atom</b> | <b>Length/\AA</b> |
|-------------|-------------|-------------------|-------------|-------------|-------------------|
| <b>O5</b>   | C7          | 1.247(2)          | N3          | C9          | 1.365(3)          |
| <b>O4</b>   | N2          | 1.213(2)          | C7          | C5          | 1.518(2)          |
| <b>O6</b>   | C7          | 1.246(2)          | C3          | C4          | 1.381(2)          |

|    |     |          |     |     |          |
|----|-----|----------|-----|-----|----------|
| N4 | C10 | 1.326(2) | C3  | C2  | 1.369(3) |
| N4 | C8  | 1.367(3) | C6  | C5  | 1.381(2) |
| N2 | O3  | 1.221(2) | C6  | C1  | 1.383(2) |
| N2 | C3  | 1.471(2) | C10 | C11 | 1.479(3) |
| O2 | N1  | 1.220(2) | C5  | C4  | 1.383(2) |
| N1 | O1  | 1.218(2) | C1  | C2  | 1.374(2) |
| N1 | C1  | 1.473(2) | C8  | C9  | 1.328(3) |
| N3 | C10 | 1.322(2) | C11 | C12 | 1.517(3) |

**Table: S5.** Bond Angles for CT Complex.

| Atom | Atom | Atom | Angle/°    | Atom | Atom | Atom | Angle/°    |
|------|------|------|------------|------|------|------|------------|
| C8   | N4   | C10  | 109.23(17) | N3   | C10  | N4   | 106.96(17) |
| O3   | N2   | O4   | 123.66(18) | C11  | C10  | N4   | 127.52(17) |
| C3   | N2   | O4   | 118.46(17) | C11  | C10  | N3   | 125.52(17) |
| C3   | N2   | O3   | 117.88(19) | C6   | C5   | C7   | 119.26(16) |
| O1   | N1   | O2   | 124.32(19) | C4   | C5   | C7   | 120.96(17) |
| C1   | N1   | O2   | 117.56(19) | C4   | C5   | C6   | 119.77(16) |
| C1   | N1   | O1   | 118.11(16) | C6   | C1   | N1   | 118.87(17) |
| C9   | N3   | C10  | 109.73(16) | C2   | C1   | N1   | 118.78(16) |
| O6   | C7   | O5   | 126.65(16) | C2   | C1   | C6   | 122.33(17) |
| C5   | C7   | O5   | 117.29(17) | C5   | C4   | C3   | 118.63(17) |
| C5   | C7   | O6   | 116.04(17) | C1   | C2   | C3   | 116.79(16) |
| C4   | C3   | N2   | 118.73(17) | C9   | C8   | N4   | 107.26(19) |
| C2   | C3   | N2   | 118.12(15) | C12  | C11  | C10  | 113.38(17) |
| C2   | C3   | C4   | 123.13(16) | C8   | C9   | N3   | 106.82(18) |
| C1   | C6   | C5   | 119.25(16) |      |      |      |            |

**Table: S6.** Hydrogen Atom Coordinates ( $\text{\AA} \times 10^4$ ) and Isotropic Displacement Parameters ( $\text{\AA}^2 \times 10^3$ ) for CT Complex.

| Atom | x        | Y           | z           | U(eq)     |
|------|----------|-------------|-------------|-----------|
| H4   | -3295(2) | -3161(2)    | -5691.0(15) | 48.0(5)   |
| H2   | -8383(3) | -4247(2)    | -7116.4(17) | 54.7(6)   |
| H6   | -6434(2) | -5037(2)    | -3478.3(16) | 48.0(5)   |
| H3   | -1468(2) | -5433.6(19) | -1211.6(13) | 57.9(5)   |
| H8   | 2943(3)  | -7444(2)    | 286.1(19)   | 66.3(7)   |
| H11a | -2165(3) | -5039(3)    | 1602.2(19)  | 67.9(7)   |
| H11b | -3411(3) | -5686(3)    | 406.7(19)   | 67.9(7)   |
| H9   | 1402(3)  | -6242(2)    | -1636.6(19) | 65.5(7)   |
| H12a | -1940(7) | -7581(12)   | 2456(9)     | 101.8(10) |

|             |           |           |          |           |
|-------------|-----------|-----------|----------|-----------|
| <b>H12b</b> | -3926(13) | -7010(6)  | 2197(12) | 101.8(10) |
| <b>H12c</b> | -3250(20) | -8186(6)  | 1275(3)  | 101.8(10) |
| <b>H4a</b>  | 890(30)   | -7280(30) | 1770(20) | 71(7)     |

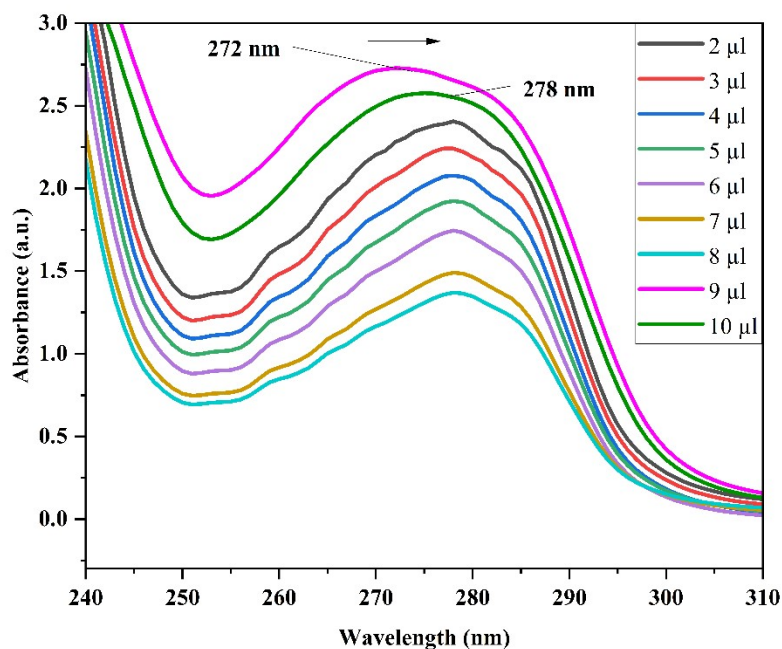

**Fig. S1.** UV titration spectra displaying shift of 6 nm in the wavelength on the addition of CT Complex in BSA.

**Table: S7.** Antibacterial activity of CT complex at various concentrations.

| S1                             | Bacterial Strain             | D1 (10<br>µg/mL) | D2 (20<br>µg/mL) | D3 (40<br>µg/mL) | D4 (80<br>µg/mL) | Gentamicin<br>(80 µg/mL) |
|--------------------------------|------------------------------|------------------|------------------|------------------|------------------|--------------------------|
| <b>Zone of Inhibition (mm)</b> |                              |                  |                  |                  |                  |                          |
| 1                              | <i>Escherichia coli</i>      | 9.7±0.69         | 14.1±1.2         | 23.5±0.25        | 24.4±0.95        | 35.0±0.62                |
| 2                              | <i>Bacillus subtilis</i>     | 15.3±0.57        | 18.3±0.38        | 19.2±0.63        | 26.8±0.54        | 32.0±1.04                |
| 3                              | <i>Staphylococcus aureus</i> | 8.3±0.54         | 10.4±0.85        | 15.6±0.85        | 16.2±0.87        | 20.01±0.92               |

**Table S8.** Antibacterial activity of donnar at various concentrations.

| S1                             | Bacterial Strain        | D1 (10<br>µg/mL) | D2 (20<br>µg/mL) | D3 (40<br>µg/mL) | D4 (80<br>µg/mL) | Gentamicin<br>(80 µg/mL) |
|--------------------------------|-------------------------|------------------|------------------|------------------|------------------|--------------------------|
| <b>Zone of Inhibition (mm)</b> |                         |                  |                  |                  |                  |                          |
| 1                              | <i>Escherichia Coli</i> | 6.1±1.34         | 11.2±0.91        | 18.4±1.52        | 19.4±1.12        | 35.0±0.62                |

|   |                              |          |           |           |           |            |
|---|------------------------------|----------|-----------|-----------|-----------|------------|
| 2 | <i>Bacillus Subtilis</i>     | 9.3±1.89 | 13.6±0.91 | 14.7±1.76 | 21.9±0.88 | 32.0±1.04  |
| 3 | <i>Staphylococcus Aureus</i> | 7.3±0.79 | 9.2±1.09  | 15.1±1.91 | 18.3±0.96 | 20.01±0.92 |

**Table S9.** Antibacterial activity of acceptor at various concentrations.

| S1                             | Bacterial Strain             | D1 (10<br>µg/mL) | D2 (20<br>µg/mL) | D3 (40<br>µg/mL) | D4 (80<br>µg/mL) | Gentamicin<br>(80 µg/mL) |
|--------------------------------|------------------------------|------------------|------------------|------------------|------------------|--------------------------|
| <b>Zone of Inhibition (mm)</b> |                              |                  |                  |                  |                  |                          |
| 1                              | <i>Escherichia Coli</i>      | 6.9±1.22         | 10.5±0.98        | 19.3±1.12        | 17.2±1.56        | 35.0±0.62                |
| 2                              | <i>Bacillus Subtilis</i>     | 8.7±1.98         | 11.3±1.59        | 15.6±1.94        | 22.9±1.58        | 32.0±1.04                |
| 3                              | <i>Staphylococcus Aureus</i> | 8.1±0.94         | 6.9±0.98         | 13.2±1.9         | 19.2±0.97        | 20.01±0.92               |

**Table S10.** Antifungal activity of CT complex at various concentrations.

| S1                             | Fungal Strain             | D1 (10<br>µg/mL) | D2 (20<br>µg/mL) | D3 (40<br>µg/mL) | D4 (80<br>µg/mL) | Nystatin (80<br>µg/mL) |
|--------------------------------|---------------------------|------------------|------------------|------------------|------------------|------------------------|
| <b>Zone of Inhibition (mm)</b> |                           |                  |                  |                  |                  |                        |
| 1                              | <i>Aspergillus niger</i>  | 9.1±0.82         | 17.3±0.65        | 19.4±0.87        | 21.2±0.12        | 24.2±1.483             |
| 2                              | <i>Candida albicans</i>   | 6.9±1.2          | 16.9±0.41        | 15.2±0.73        | 18.6±0.36        | 22.6±1.140             |
| 3                              | <i>Fusarium oxysporum</i> | 9.8±0.87         | 14.3±0.91        | 16.2±0.90        | 19.1±0.59        | 24.6±1.140             |

**Table S11.** Antifungal activity of donor at various concentrations.

| S1                             | Fungal Strain             | D1 (10<br>µg/mL) | D2 (20<br>µg/mL) | D3 (40<br>µg/mL) | D4 (80<br>µg/mL) | Nystatin (80<br>µg/mL) |
|--------------------------------|---------------------------|------------------|------------------|------------------|------------------|------------------------|
| <b>Zone of Inhibition (mm)</b> |                           |                  |                  |                  |                  |                        |
| 1                              | <i>Aspergillus Niger</i>  | 8.2±1.34         | 15.3±0.91        | 19.2±1.18        | 20.3±1.05        | 24.2±1.483             |
| 2                              | <i>Candida Albicans</i>   | 7.1±0.91         | 11.2±0.67        | 14.9±1.09        | 17.6±1.71        | 22.6±1.140             |
| 3                              | <i>Fusarium Oxysporum</i> | 8.3±1.39         | 10.1±1.85        | 9.2±1.71         | 16.3±1.81        | 24.6±1.140             |

**Table S12.** Antifungal activity of acceptor at various concentrations.

| S1                             | Fungal Strain             | D1 (10 $\mu\text{g/mL}$ ) | D2 (20 $\mu\text{g/mL}$ ) | D3 (40 $\mu\text{g/mL}$ ) | D4 (80 $\mu\text{g/mL}$ ) | Nystatin (80 $\mu\text{g/mL}$ ) |
|--------------------------------|---------------------------|---------------------------|---------------------------|---------------------------|---------------------------|---------------------------------|
| <b>Zone of Inhibition (mm)</b> |                           |                           |                           |                           |                           |                                 |
| 1                              | <i>Aspergillus Niger</i>  | 7.3 $\pm$ 1.11            | 14.2 $\pm$ 1.45           | 17.1 $\pm$ 0.98           | 20.1 $\pm$ 1.56           | 24.2 $\pm$ 1.483                |
| 2                              | <i>Candida Albicans</i>   | 5.1 $\pm$ 1.89            | 9.5 $\pm$ 0.81            | 15.2 $\pm$ 1.89           | 16.3 $\pm$ 0.81           | 22.6 $\pm$ 1.140                |
| 3                              | <i>Fusarium Oxysporum</i> | 7.3 $\pm$ 1.56            | 11.2 $\pm$ 1.74           | 7.3 $\pm$ 1.9             | 16.9 $\pm$ 1.73           | 24.6 $\pm$ 1.140                |

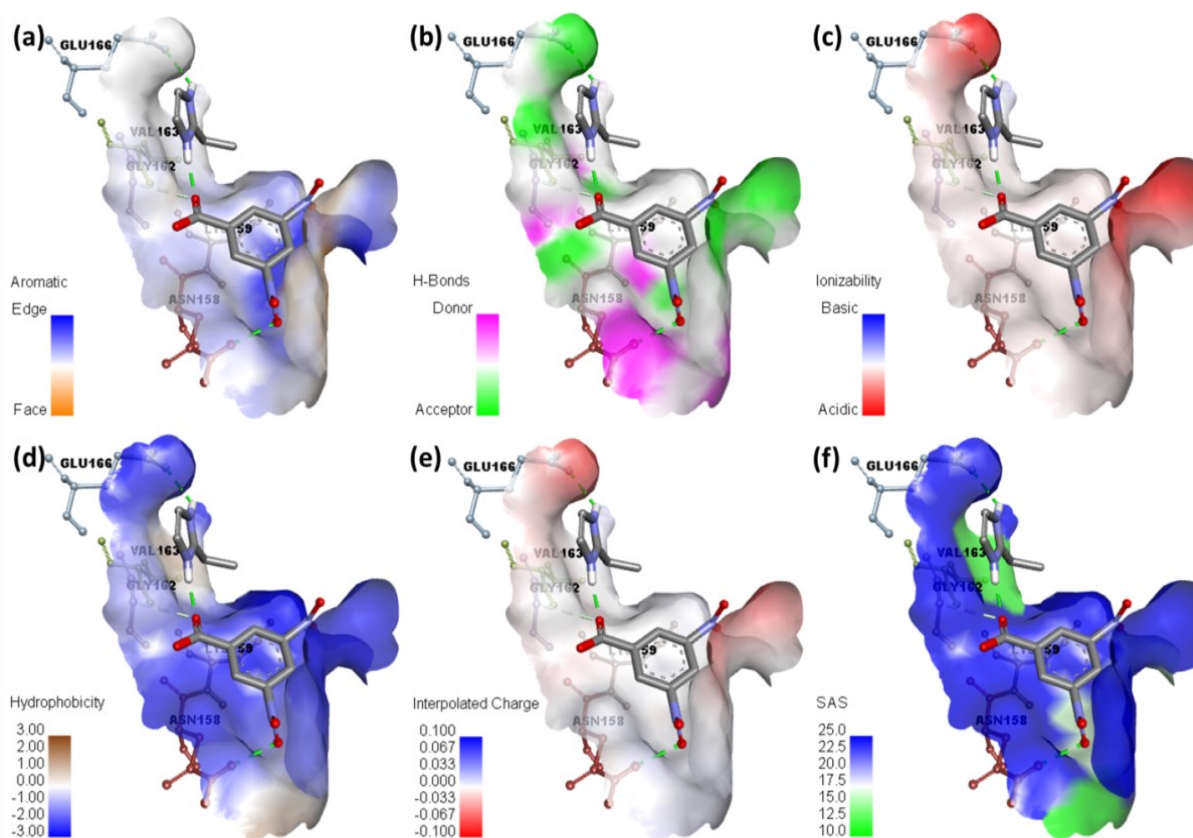

**Fig. S2.** Representation of (a) aromatic surface, (b) hydrogen binding surface, (c) ionizability surface, (d) hydrophobic surface, (e) interpolated charge surface, and (f) solvent accessible surface at interaction site of CT complex and 3V03.

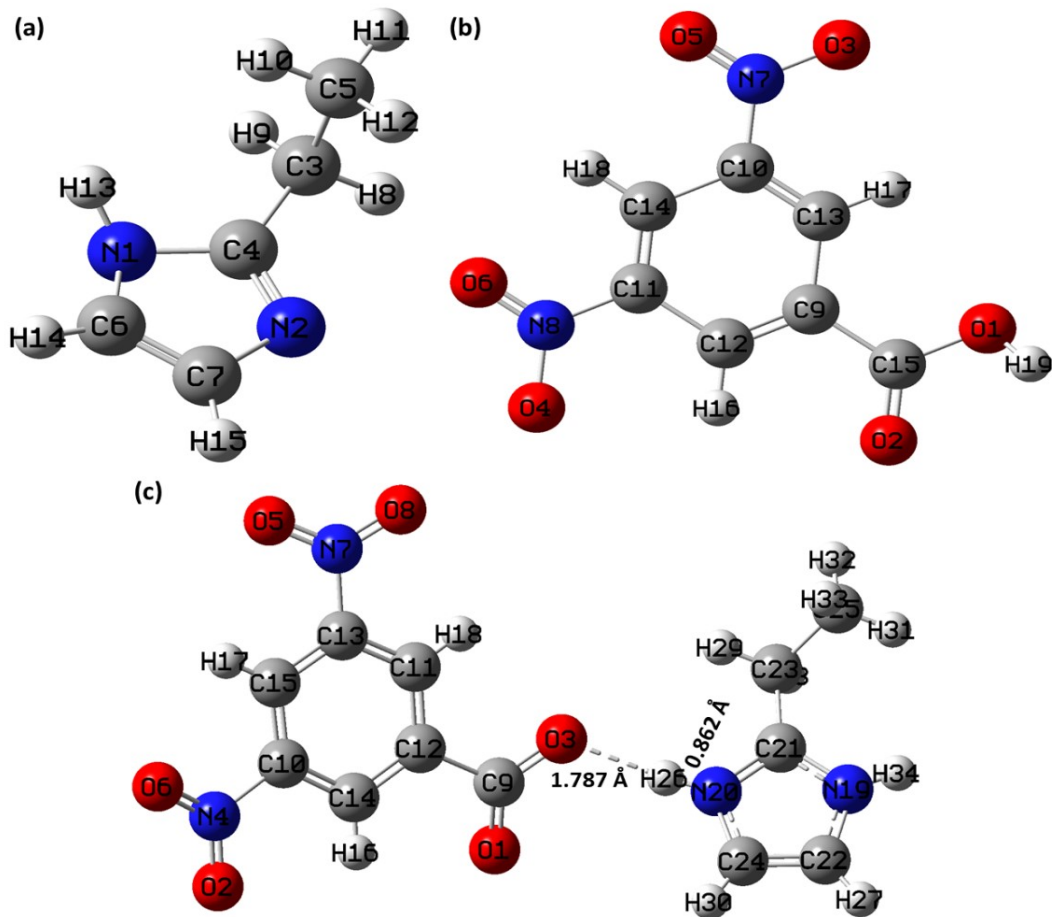

**Fig. S3.** Optimized structure of (a) 2-EI, (b) 3,5-DNB, and (c) CT complex with Mulliken atom numbering scheme.

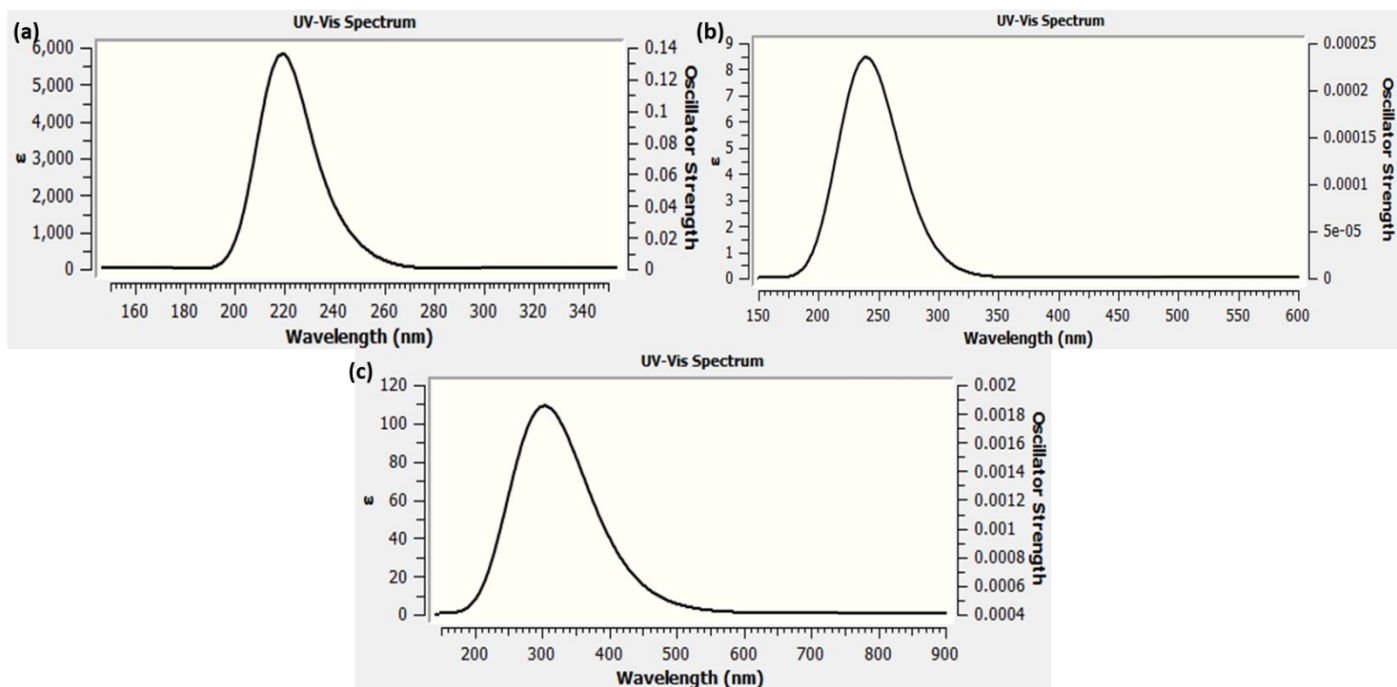

**Fig. S4.** Simulated UV-Vis spectra of (a) for 2-EI, (b) 3,5-DNB, and (c) synthesized CTC obtained through TD-DFT in gas phase.

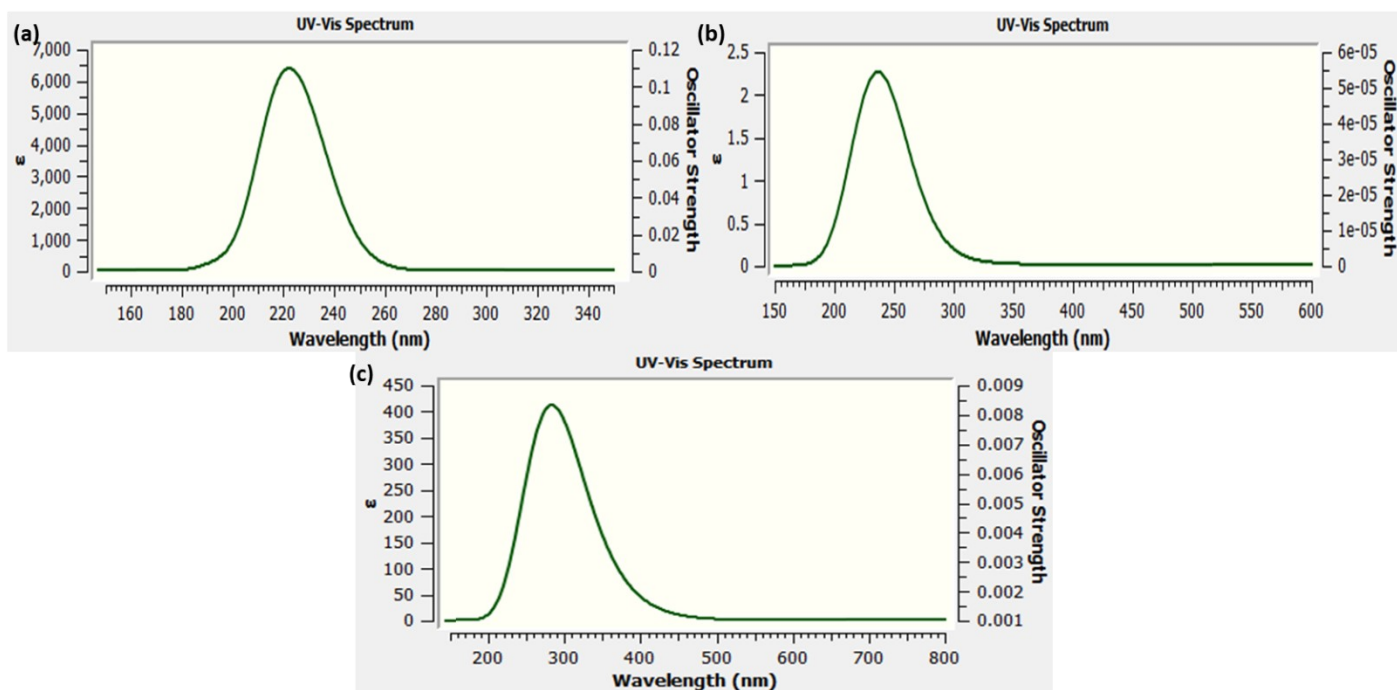

**Fig. S5.** Simulated UV-Vis spectra of (a) for 2-EI, (b) 3,5-DNB, and (c) synthesized CTC obtained through TD-DFT in DMSO.



**Table S13.** TD-DFT calculated electronic excitation parameters for the CT complex in DMSO and gas phase, showing the wavelength, energy, oscillator strength, and orbital contributions for the significant excited states.

|           | Excited State | Wavelength (nm) | Oscillator Strength (f) | Orbital Contribution |
|-----------|---------------|-----------------|-------------------------|----------------------|
| Gas phase | S1            | 272             | 0.0019                  | HOMO → LUMO          |
|           | S2            | 247             | 0.0006                  | HOMO -1 → LUMO       |
| DMSO      | S1            | 274             | 0.0082                  | HOMO → LUMO          |
|           | S2            | 251             | 0.0018                  | HOMO -1 → LUMO       |
